# Supplementary material for: Structural integrity investigations of spent nuclear fuel with finite element modeling
Source: Copernicus journal article supplement (doi:10.5194/sand-1-13-2021), 2021-11-10

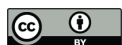

*Supplement of*

## **Structural integrity investigations of spent nuclear fuel with finite element modeling**

**Efstathios Vlassopoulos et al.**

*Correspondence to:* Efstathios Vlassopoulos (vse@nagra.ch)

The copyright of individual parts of the supplement might differ from the article licence.



# Structural Integrity Investigations of Spent Nuclear Fuel with Finite Element Modeling

S. Pudollek

Interdisciplinary research symposium: On the safety of nuclear disposal practices, Berlin, 10-12 November 2021

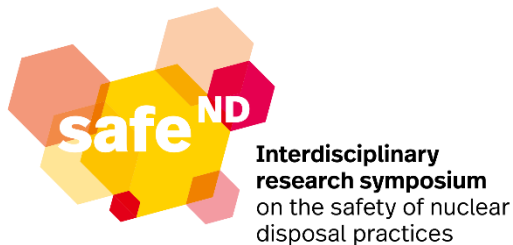

nagra.

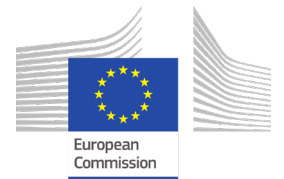



# Introduction

- Swiss waste management includes various back-end activities before SNF final disposal
  - wet/dry interim storage, transport, handling and re-packaging for final disposal
- SNF is subjected to various temperature and loading conditions
- Pre-disposal requirements:
  - ensure **safety** of SNF handling and encapsulation operations
  - investigate **fuel ageing** mechanisms during long-term dry interim storage

Swiss waste management concept: SNF flow to final disposal

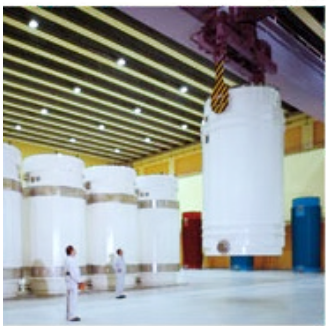

Dry Interim Storage

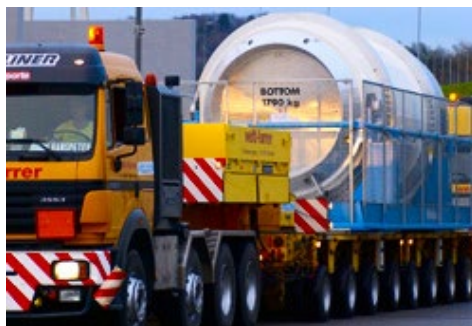

Cask Transport

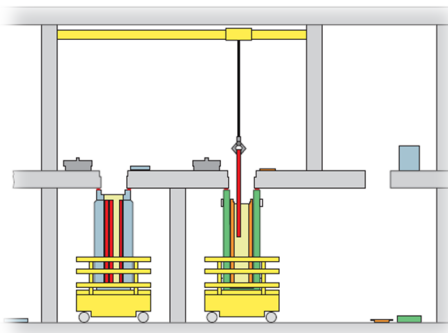

Encapsulation Plant

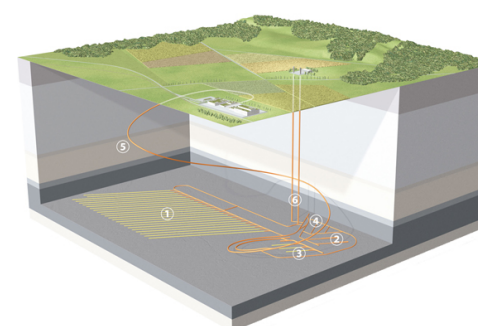

Deep geological Repository

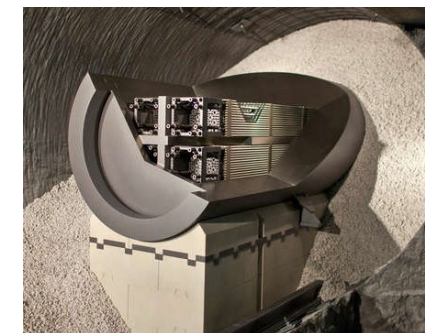

Final Disposal Canister



- Mechanical response of SNF depends on:
  - cladding properties being of highest importance and
  - fuel/cladding interaction and composite SNF material properties
- The mechanical properties of nuclear fuel rods change:
  - During irradiation (pellet cracking, cladding embrittlement, PCMI, etc.)
  - After irradiation (hydride formation and/or re-orientation, radioactive decay damage, etc.)
- Challenge...
  - Predicting **mechanical response** of SNF in different loading types
  - Evaluate **consequences** in case of SNF rod integrity loss

before  
irradiation

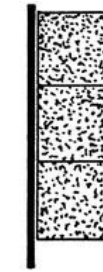

Known geometrical  
and mechanical prop.

after  
irradiation

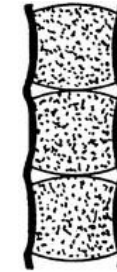

Hydrogen absorption  
and change of mech.  
& geom. prop.

after  
dry-storage

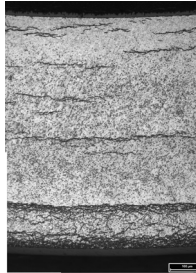

Hydride reorientation  
and ageing effects  
→ mech. prop. ?

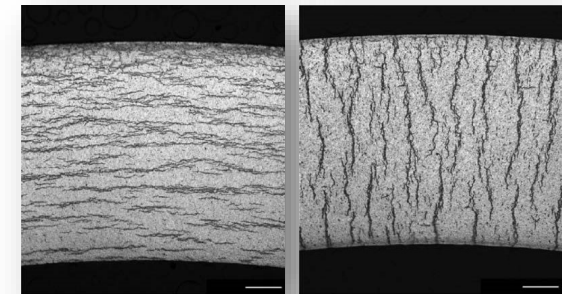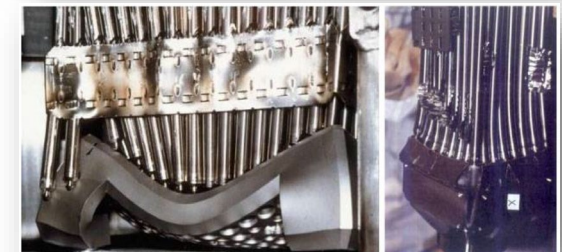



- **Objective:**
  - Assess the mechanical response of SNF rods in quasi-static & dynamic loads
- **Approach, i.e. experimental / numerical :**
  - Investigate **mechanical properties** of SNF rod: empirical laws:  $\sigma_f = f(BU, \varepsilon)$
  - Study rod **failure** processes and consequences
  - Develop Finite Element Models (**FEM**) validated against experimental data

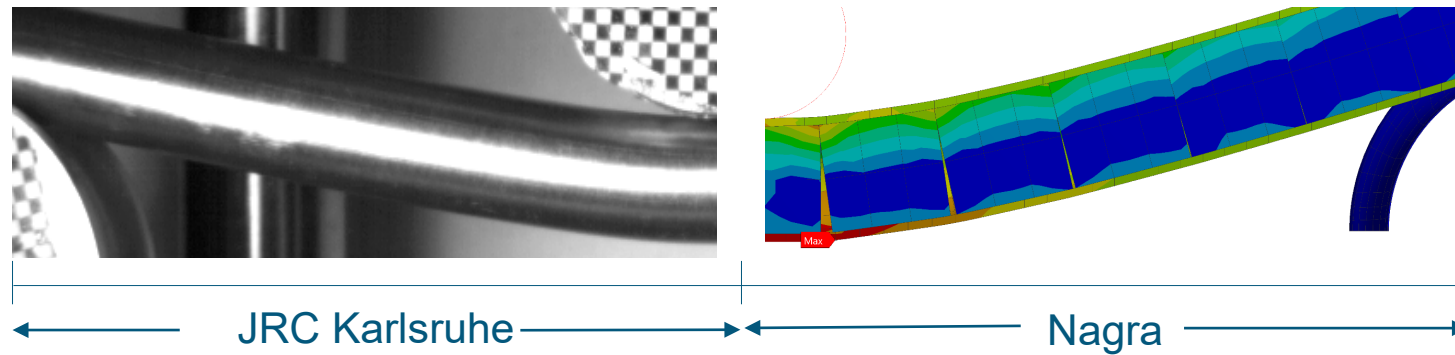



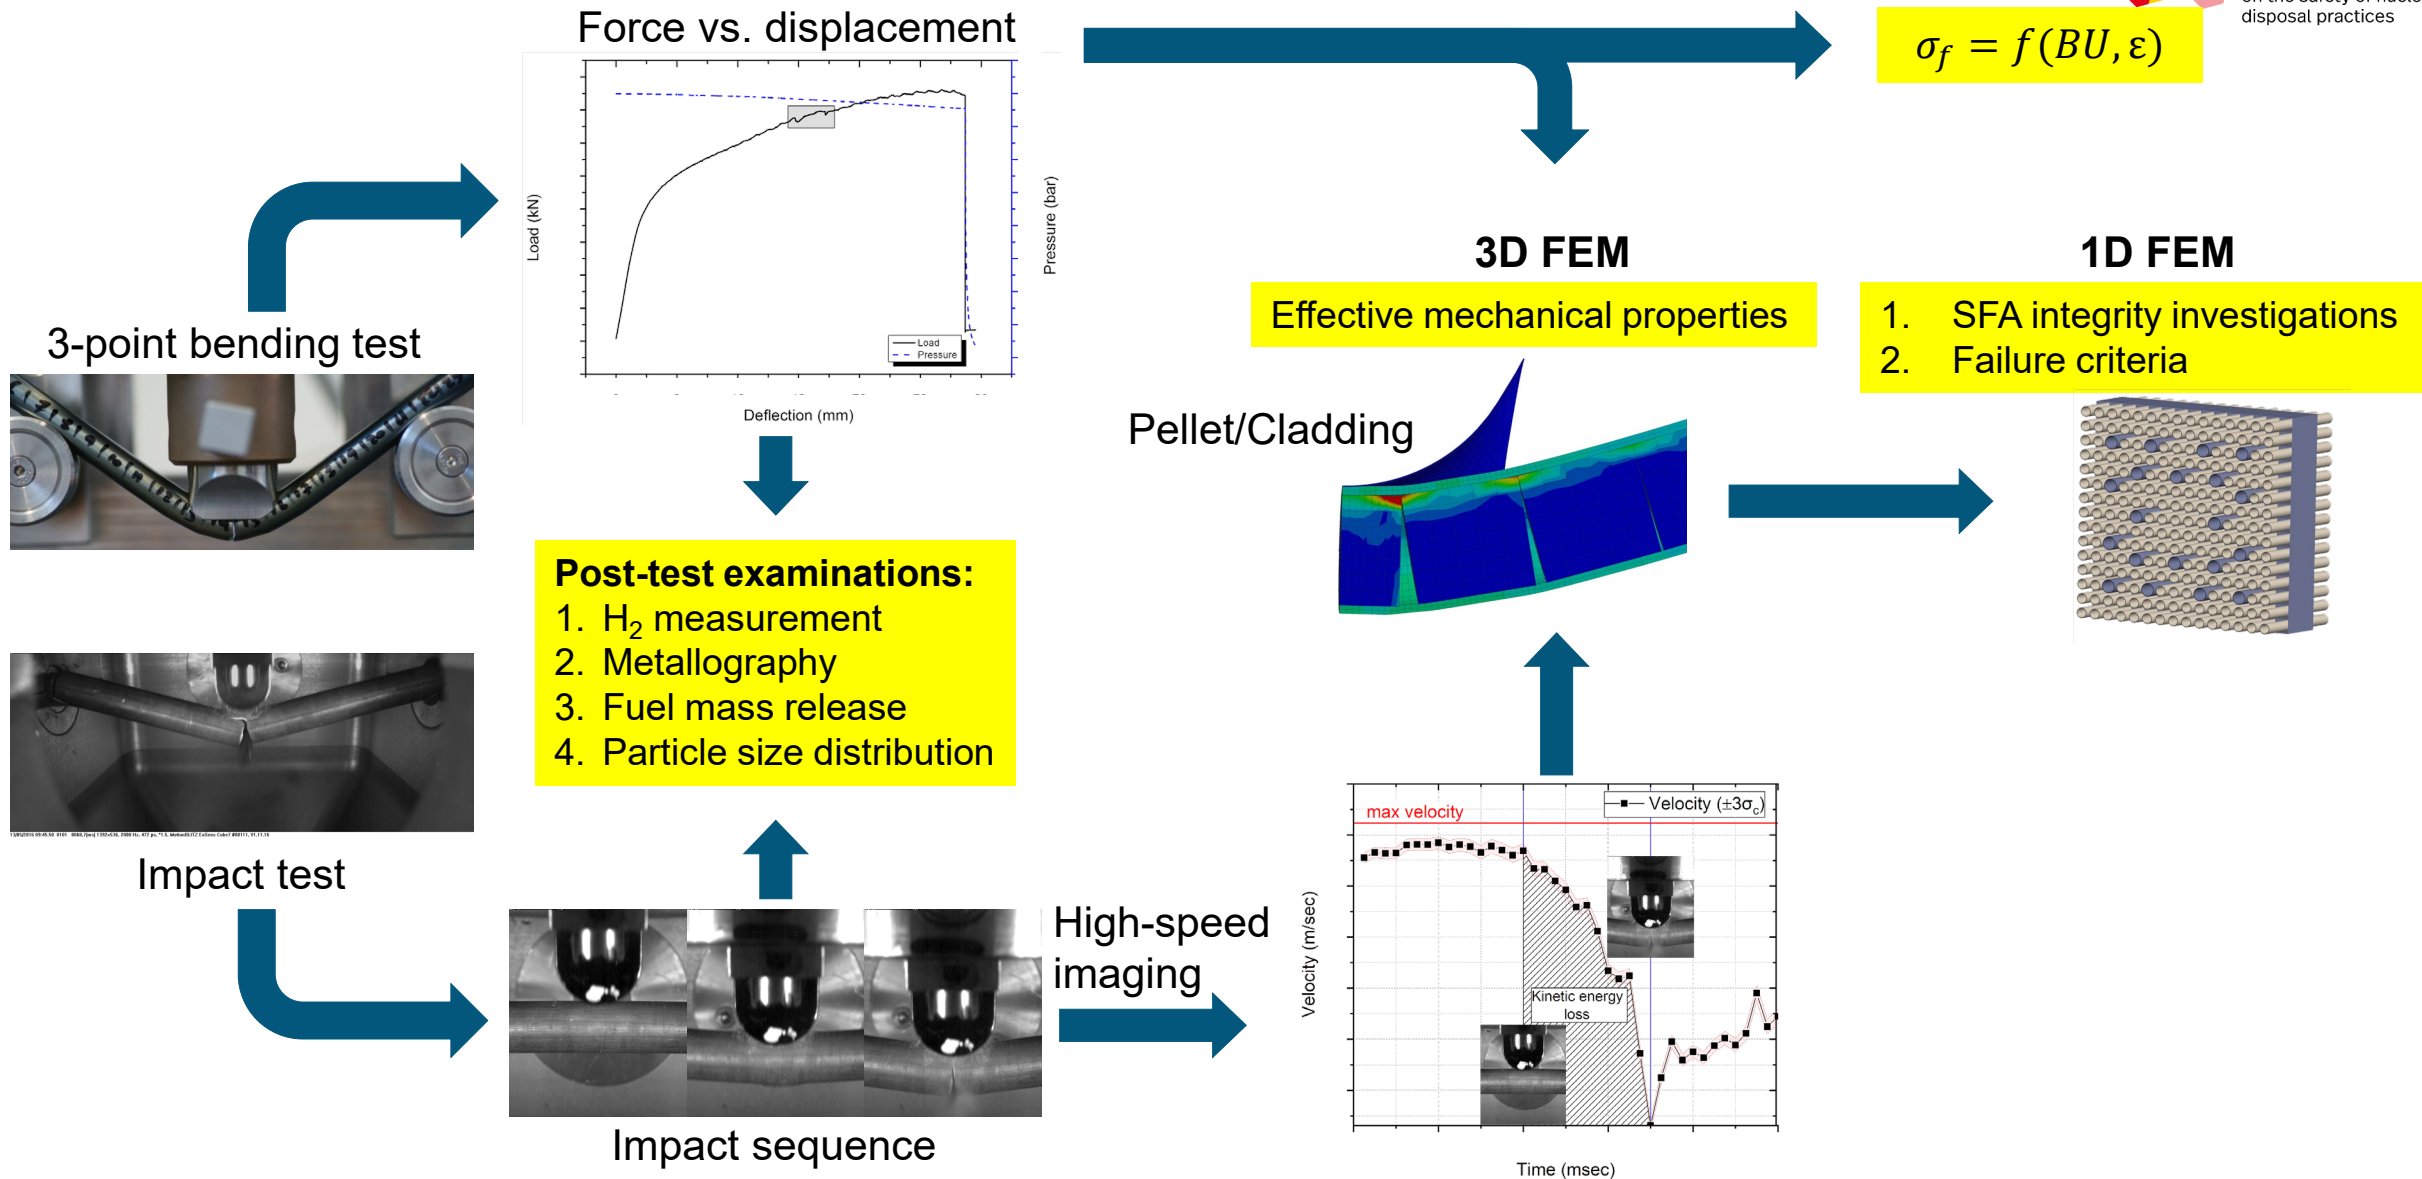



# 3-Point Bending Tests – Setup and Method

- **Quasi-static** loads: 1 mm/min applied with step-motor
- **Sensors:** pressure, displacement and applied loads
- Use of **simple beam theory** for flexural properties derivation
  - Properties derived as function of:
    - Burnup
    - Cladding hydrogen content

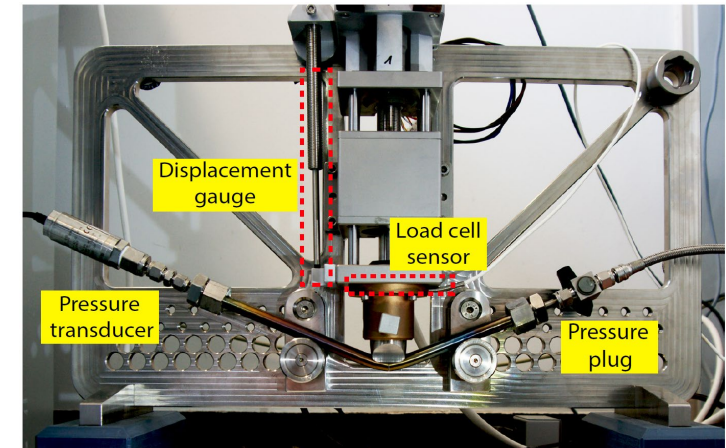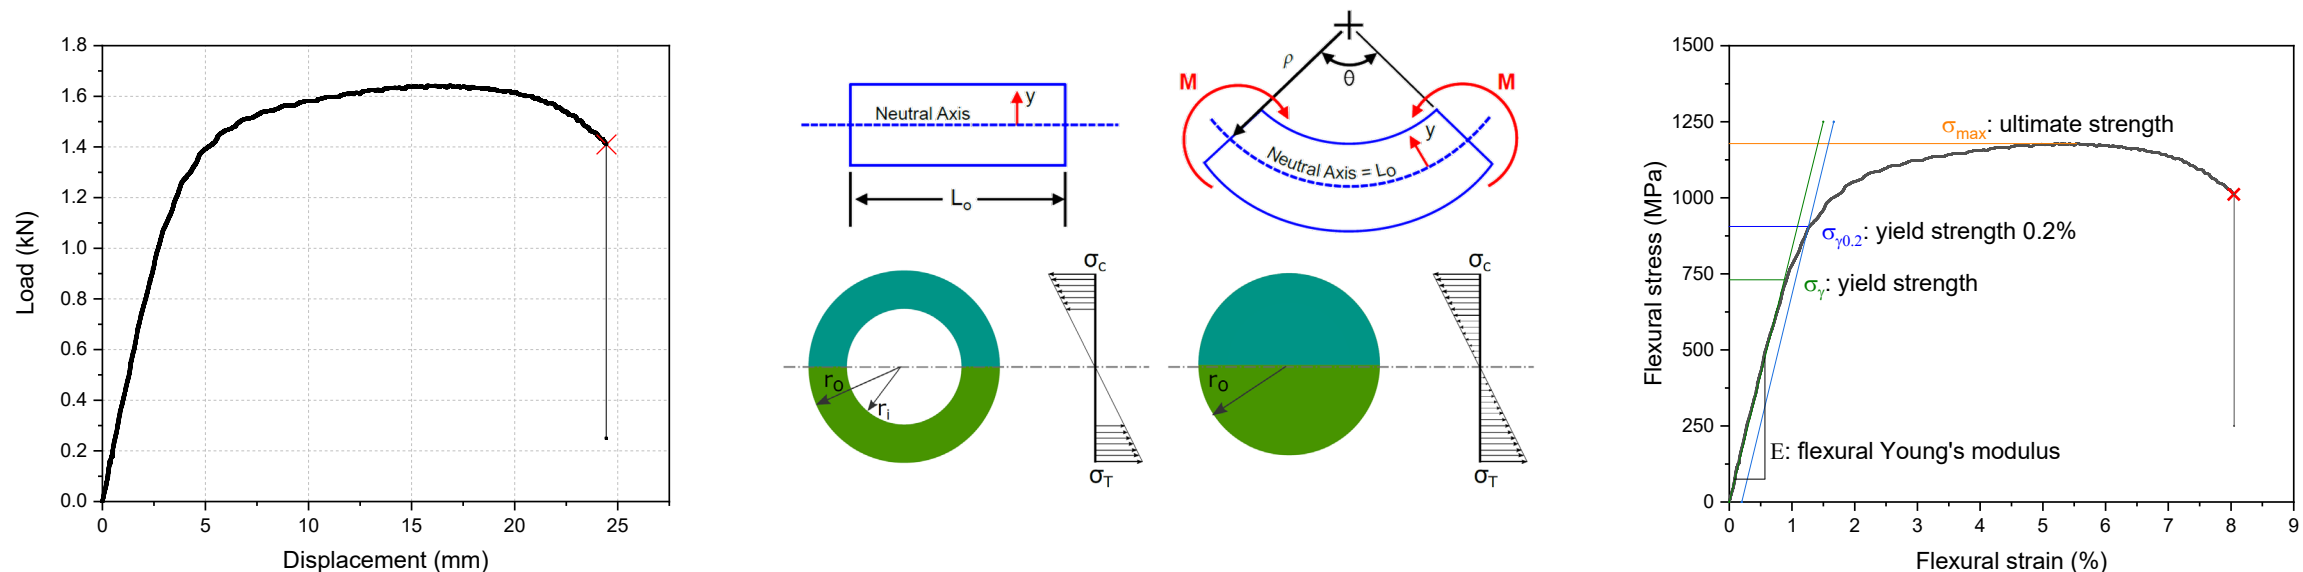



- Objective:
  - Derive **effective mechanical properties** of SNF rod that reflect the mechanical response of the composite spent fuel/cladding system
- **Finite Element Modeling (FEM)** in ANSYS Mechanical with implicit static structural analysis for the 3-point bending case
- Modeling **approach**:
  1. Explicit modeling of fuel and pellets (3D FEM) to simulate experimental tests
  2. Sensitivity analysis of the model and calibration against experimental results
  3. Simplification of modeling approach (1D FEM)

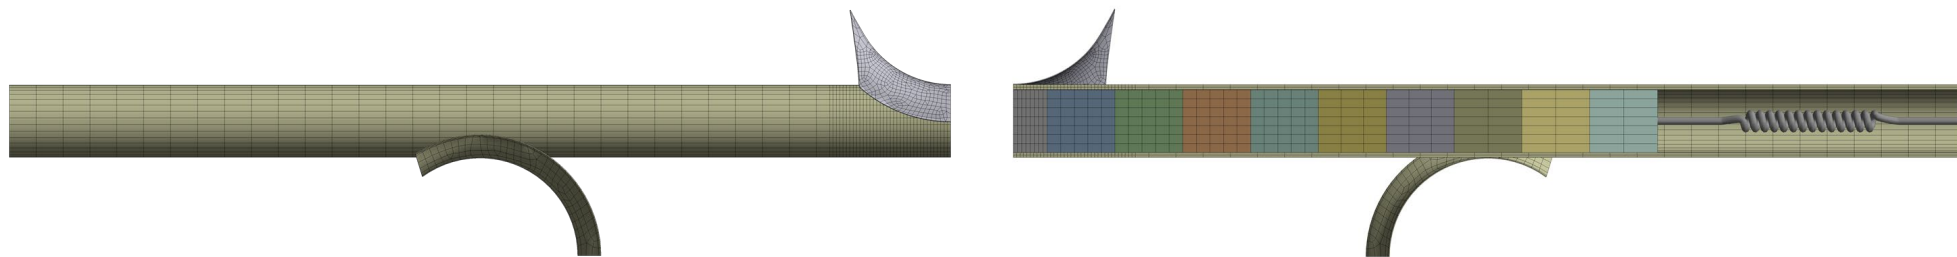



# 3D Finite Element Modeling

- **Development** approach:
  - Based on 3-point bending tests on surrogate rods
  - Uncertainties elimination (known mechanical properties & fixed geometry)

- **Sensitivity** analysis:
  1. Material model for pellets/cladding
  2. Numerical parameters
  3. Physical parameters

- Final model as:
  - Best compromise between **solution quality** and **computational time**
- SNF rod effective **properties derivation**
  - **Optimization** process minimizing difference between experimental and numerical results
    - Evaluate parameters relative importance
    - Best model provides material parameters

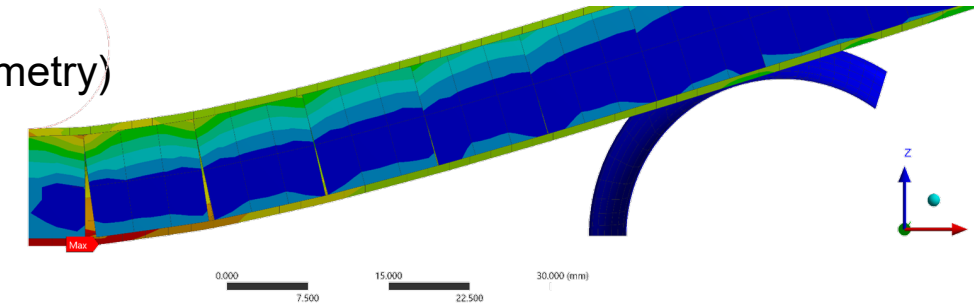

Voce plasticity model used for cladding

$$\sigma = \sigma_0 + R_0 \varepsilon_{pl} + R_{inf} (1 - e^{-b \varepsilon_{pl}})$$

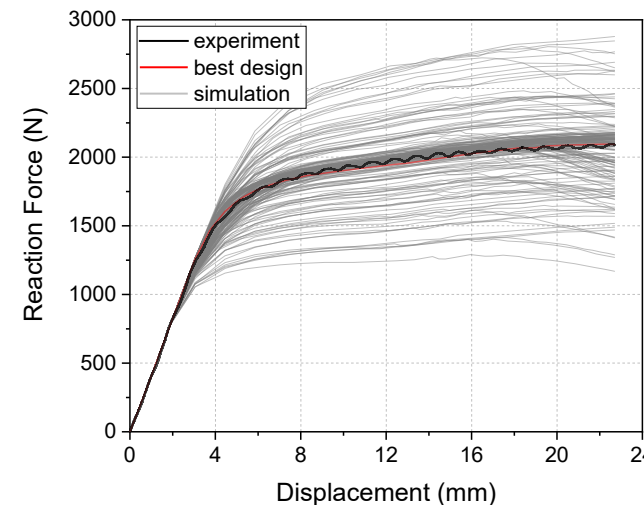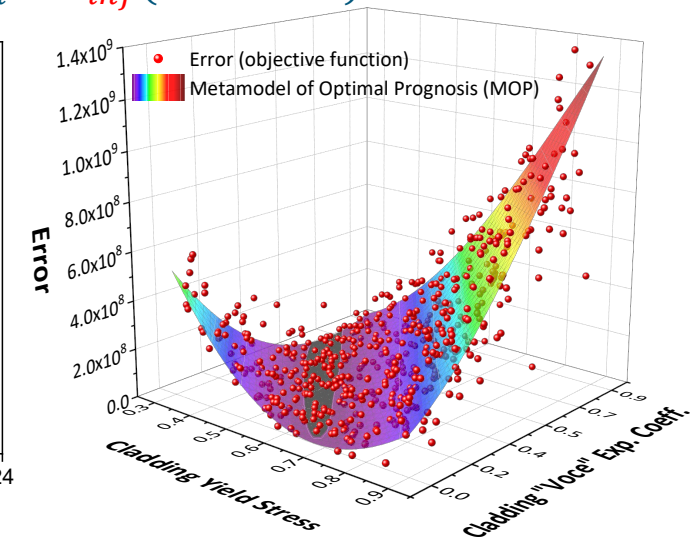



# Towards 1D Beam Modeling

- 3D FE model can **accurately** predict bending behavior
  - However, **too slow** to be used for a large scale SFA design

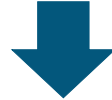

- A 1D beam model was created and optimized to fit experimental data
  - Faster convergence compared to the 3D model
  - Optimized to predict bending behavior as accurately as the 3D model

3D detailed modeling on  
small fuel segments

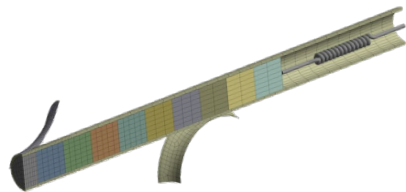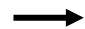

1D beam modeling  
at small-scale

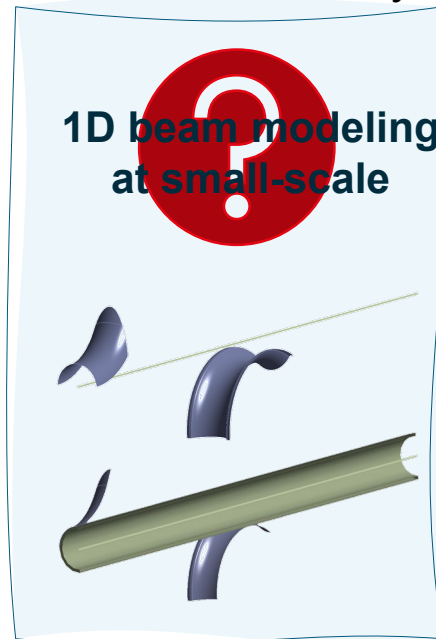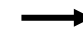

1D beam modeling  
at full-scale

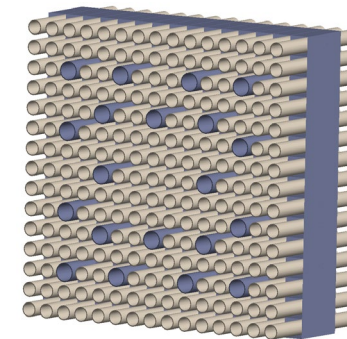

**EPFL**

Towards beam modelling for static  
structural analysis of spent nuclear fuel  
rods

Michele Bellotti  
Department of Physics  
Ecole Polytechnique Fédérale de Lausanne

*This dissertation is submitted for the degree of*  
M.Sc. in Nuclear Engineering

*Under the supervision of*  
Prof. Dr. Andreas Pautz (EPFL)  
Efstathios Vlassopoulos (NAGRA)

November 2020



# Towards Full-Scale Model – Single Spacer Grid Models

- **Step-wise** development of full-scale PWR SFA model
  - Spacer grid, rods and guide tubes modeling (from 2x2 to 5x5 and 15x15)
    - Fuel rods modeled using beam elements
    - Spacer grid modeled using either beam or shell elements
    - ANSYS spring elements are used to model spacer grid springs and dimples
- In each step the model convergence was optimized
  - Contacts/interactions between beam-to-beam and beam-to-spacer grid
  - Faster convergence

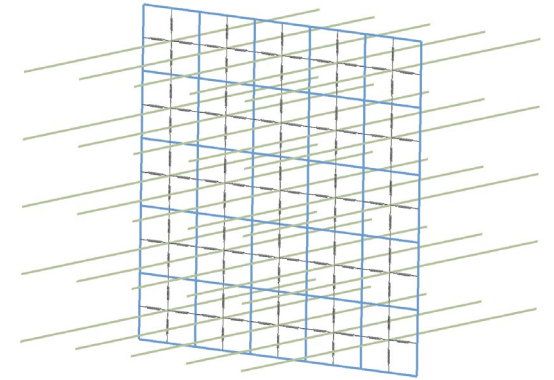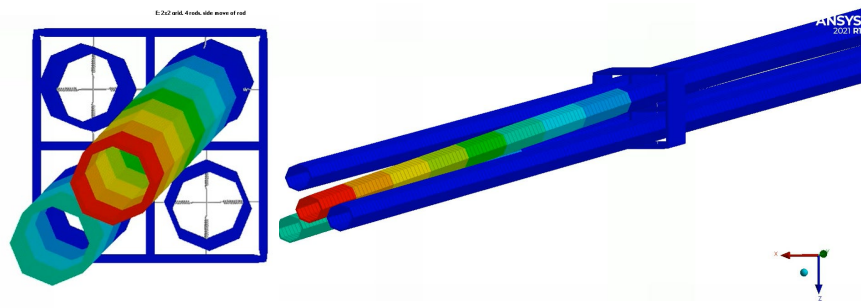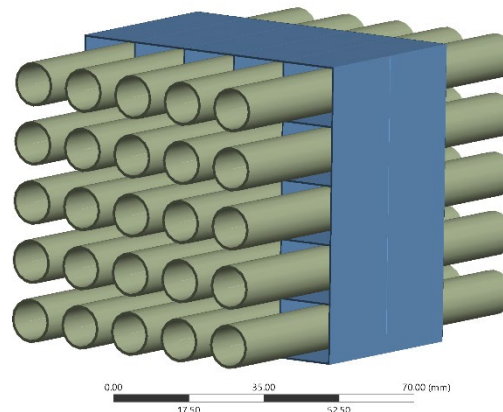

**No guide tubes  
implemented**

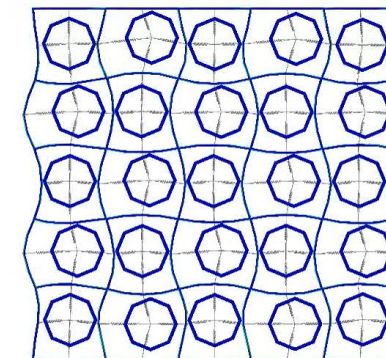

**1 guide tube  
implemented**

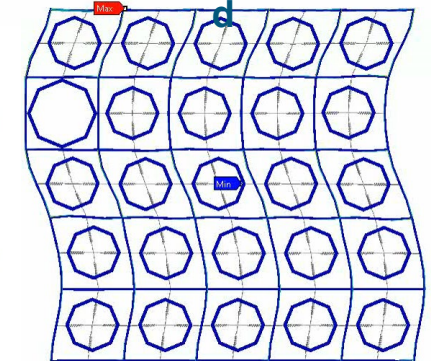



# Towards Full-Scale Model – SFA Sub-Model

- Extension of sub-model to include 4 spacer grids in 15x15 grid
  - Top and bottom end pieces (simplified design – perforated shell element plates)
- Simulation of various loading configurations
  - Used to determine model stability and evaluate simulation time

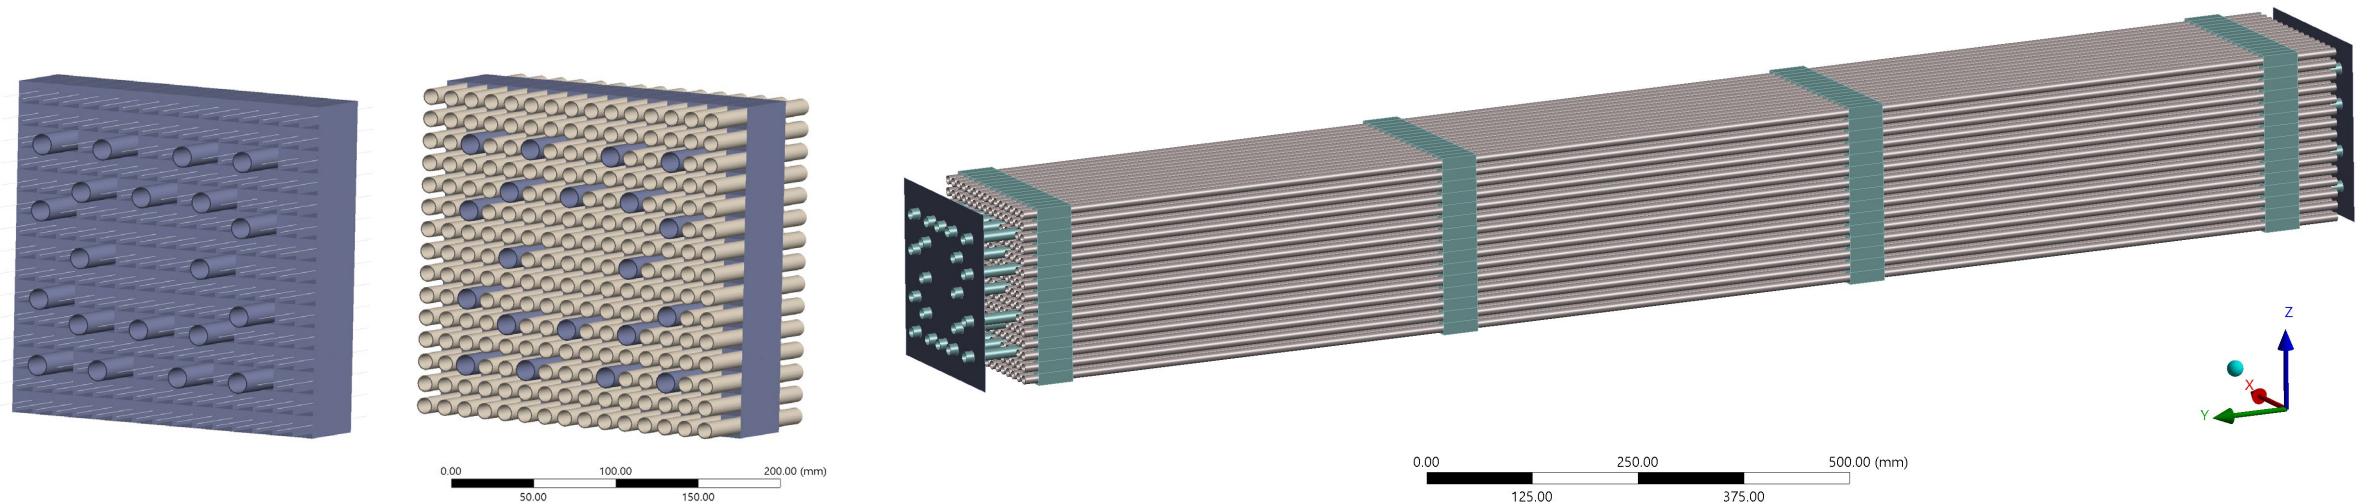



# Loading Scenarios Tested

- Two different loading conditions have been tested simulating postulated accident scenarios:
  1. Spacer grid deformation
  2. Bending of SFA

SG deformation:  
12 mm compressive load

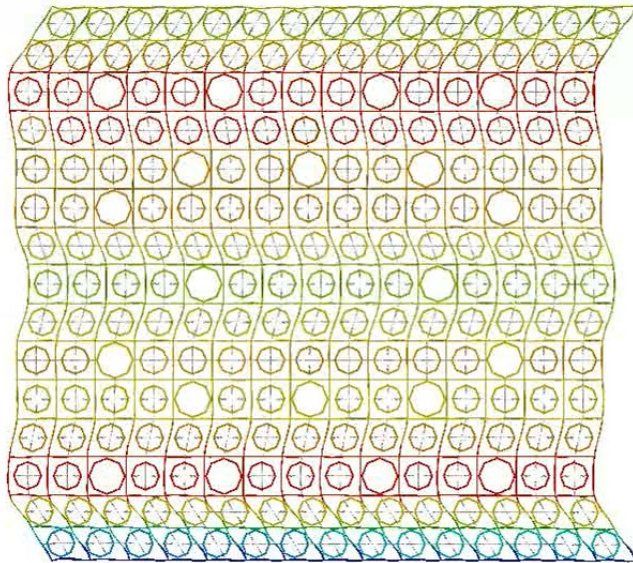

Bending:  
Obstacle btw 1<sup>st</sup> and 2<sup>nd</sup> spacer grids

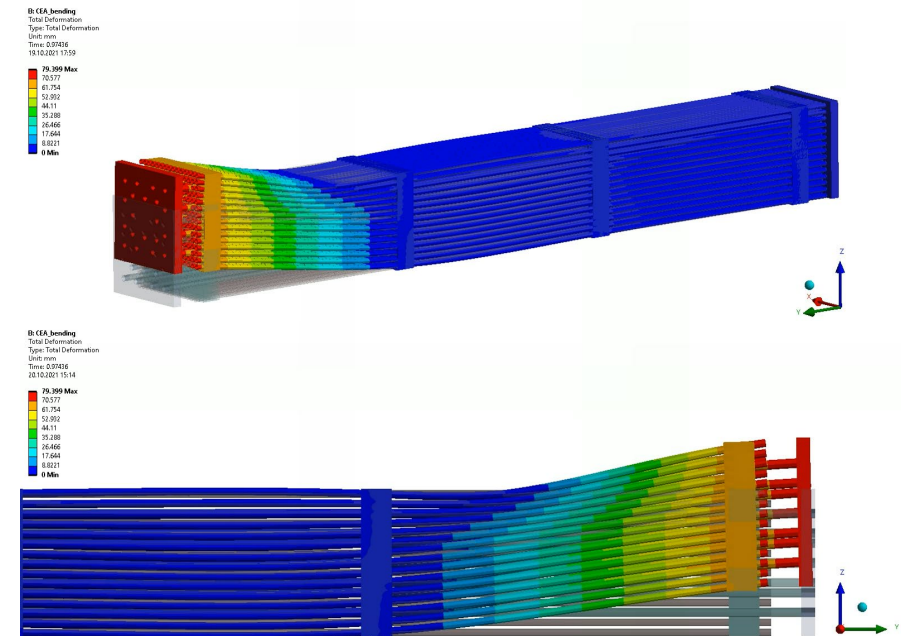



# Future Goals

- Development of full-scale 15x15 PWR SFA model
- Mechanical **properties variation** based on axial positions
  - Burnup profile
- **Failure criteria** based on rods plastic strain
  - Derived from calibration process against experimental results
- **Investigation of SFA structural integrity** under different loading scenarios
  - Current data can be used for static analysis under bending loads
- Further optimization of existing and future models to reduce simulation time

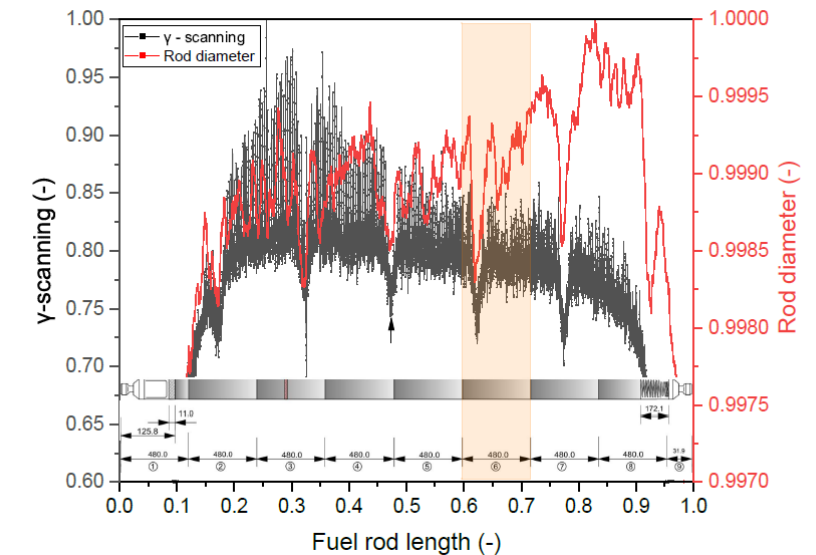



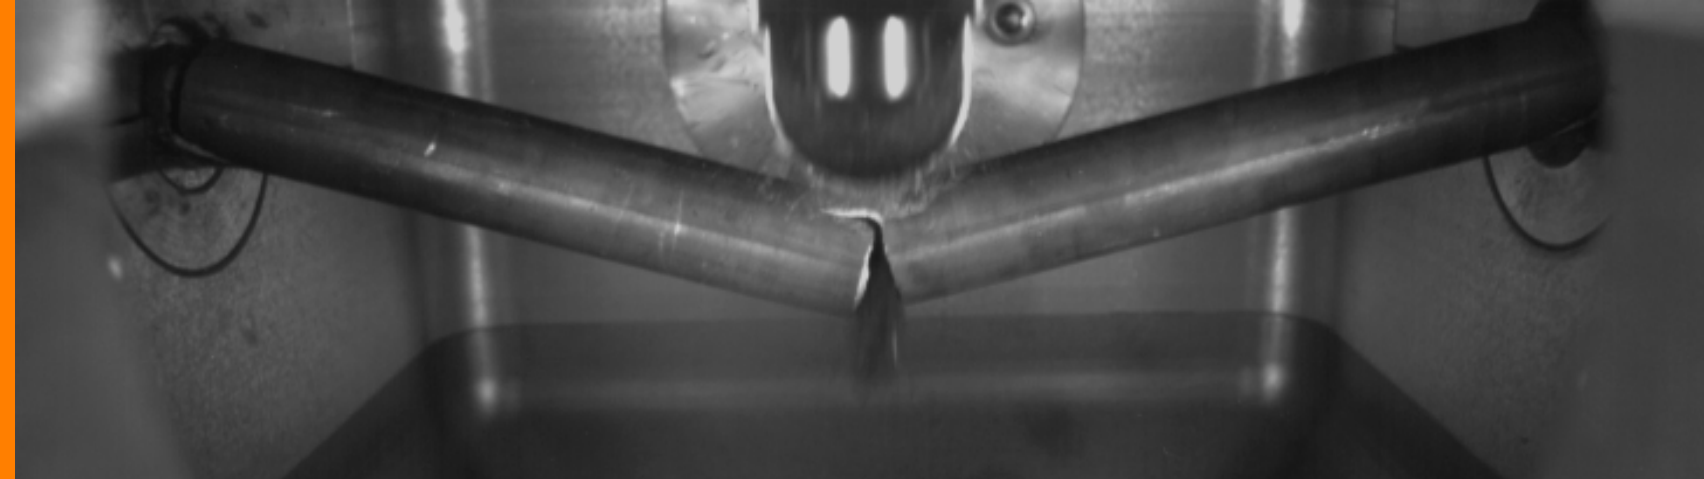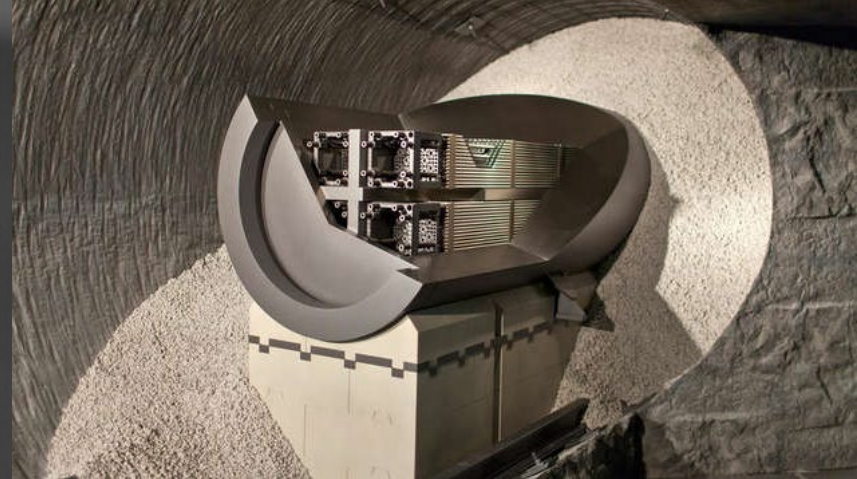

- **JRC-Karlsruhe**

Dimitrios Papaioannou, Ramil Nasyrow, Ralf Gretter, Vincenzo V. Rondinella

- **Kernkraftwerk Gösgen**

Stefano Caruso

- **Nagra:**

Efstathios Vlassopoulos, Susanne Pudollek, Olympios Alifieris

thank you  
for your attention

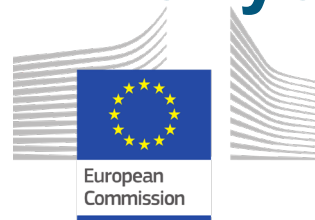

nagra. 

Supplement: Supplementary file 1 [file sand-1-13-2021-supplement.pdf]
